# Supplementary material for: Unbiased Identification of Patients with Disorders of Sex Development
Source: PubMed Central journal article supplement (PMC4182545; doi:10.1371/journal.pone.0108702), 2014-09-30
Supplement: pone.0108702.s006.pdf [file pone.0108702.s006.pdf]

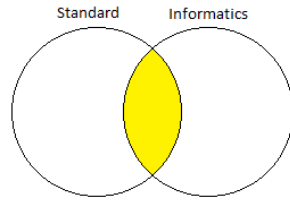

| <b>Table S6. Hospital B + Hospital C:<br/>Patients identified by Informatics and Standard Method</b> | <b>n</b> |
|------------------------------------------------------------------------------------------------------|----------|
| 255.2 ADRENOGENITAL DISORDERS                                                                        | 15       |
| 255.2 CAH (CONGENITAL ADRENAL HYPERPLASIA)                                                           | 8        |
| 255.2 CONGENITAL ADRENAL HYPERPLASIA, TYPE 1                                                         | 2        |
| 255.2 ADRENAL HYPERPLASIA, CONGENITAL                                                                | 1        |
| 255.2 ADRENAL HYPERPLASIA SYNDROME, CONGENITAL                                                       | 1        |
| 255.2 11 BETA-HYDROXYLASE DEFICIENCY                                                                 | 0        |
| 255.2 CONGENITAL ADRENAL CORTICAL HYPERPLASIA                                                        | 0        |
| 259.5 ANDROGEN INSENSITVITY SYN                                                                      | 0        |
| 259.5 PARTIAL ANDROGEN INSENSITIVITY                                                                 | 0        |
| 259.5 ANDROGEN INSENSITIVITY SYNDROME                                                                | 1        |
| 752.4 Unspecified Congenital Anomaly of Cervix, Vagina, and External Female Genitalia                | 1        |
| 752.49 CERVIX/FEM GEN ANOM NEC                                                                       | 3        |
| 752.49 CERVIX/FEM GEN ANOM                                                                           | 0        |
| 752.49 ATRESIA OF VAGINA                                                                             | 0        |
| 752.49 VAGINA, ABSENCE OF                                                                            | 0        |
| 752.51 Undescended Testis                                                                            | 7        |
| 752.61 HYPOSPADIAS                                                                                   | 19       |
| 752.61 HYPOSPADIA                                                                                    | 0        |
| 752.61 Hypospadias, male                                                                             | 3        |
| 752.64 MICROPENIS                                                                                    | 3        |
| 752.64 MICROPHALLUS                                                                                  | 1        |
| 752.69 PENILE ANOMALIES NEC                                                                          | 0        |
| 752.69 OTHER PENILE ANOMALIES                                                                        | 2        |
| 752.69 PENILE ANOMALY                                                                                | 0        |
| 752.69 ANOMALY OF PENIS                                                                              | 0        |
| 752.7 INTERSEXUALITY                                                                                 | 0        |
| 752.7 INDETERMINATE SEX                                                                              | 7        |
| 752.7 INDETERMINATE SEX AND PSEUDOHERMAPHRODITISM                                                    | 21       |
| 752.7 HERMAPHRODITISM                                                                                | 1        |
| 752.7 PERSISTENT MULLERIAN DUCT SYNDROME                                                             | 0        |
| 752.7 DISORDER OF SEXUAL DIFFERENTIATION                                                             | 0        |
| 752.7 Ambiguous genitalia                                                                            | 2        |
| 752.7 GONADAL DYSGENESIS, 46,XY                                                                      | 0        |
| CAIS complete androgen insensitivity listed without an ICD9 code                                     | 0        |
