# Supplementary material for: Unbiased Identification of Patients with Disorders of Sex Development
Source: PubMed Central journal article supplement (PMC4182545; doi:10.1371/journal.pone.0108702), 2014-09-30
Supplement: pone.0108702.s013.pdf [file pone.0108702.s013.pdf]

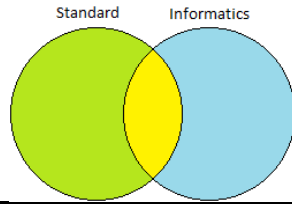

| <b>Table S13. Hospital C:<br/>Patients identified by all methods</b>                  | <b>n</b> |
|---------------------------------------------------------------------------------------|----------|
| 255.2 ADRENOGENITAL DISORDERS                                                         | 41       |
| 255.2 CAH (CONGENITAL ADRENAL HYPERPLASIA)                                            | 28       |
| 255.2 CONGENITAL ADRENAL HYPERPLASIA, TYPE 1                                          | 6        |
| 255.2 ADRENAL HYPERPLASIA, CONGENITAL                                                 | 3        |
| 255.2 ADRENAL HYPERPLASIA SYNDROME, CONGENITAL                                        | 1        |
| 255.2 11 BETA-HYDROXYLASE DEFICIENCY                                                  | 1        |
| 255.2 CONGENITAL ADRENAL CORTICAL HYPERPLASIA                                         | 1        |
| 259.5 ANDROGEN INSENSITVITY SYN                                                       | 1        |
| 259.5 PARTIAL ANDROGEN INSENSITIVITY                                                  | 1        |
| 259.5 ANDROGEN INSENSITIVITY SYNDROME                                                 | 1        |
| 752.4 Unspecified Congenital Anomaly of Cervix, Vagina, and External Female Genitalia | 0        |
| 752.49 CERVIX/FEM GEN ANOM NEC                                                        | 7        |
| 752.49 CERVIX/FEM GEN ANOM                                                            | 1        |
| 752.49 ATRESIA OF VAGINA                                                              | 1        |
| 752.49 VAGINA, ABSENCE OF                                                             | 1        |
| 752.51 Undescended Testis                                                             | 0        |
| 752.61 HYPOSPADIAS                                                                    | 143      |
| 752.61 HYPOSPADIA                                                                     | 5        |
| 752.61 Hypospadias, male                                                              | 0        |
| 752.64 MICROPENIS                                                                     | 43       |
| 752.64 MICROPHALLUS                                                                   | 6        |
| 752.69 PENILE ANOMALIES NEC                                                           | 19       |
| 752.69 OTHER PENILE ANOMALIES                                                         | 24       |
| 752.69 PENILE ANOMALY                                                                 | 2        |
| 752.69 ANOMALY OF PENIS                                                               | 1        |
| 752.7 INTERSEXUALITY                                                                  | 1        |
| 752.7 INDETERMINATE SEX                                                               | 21       |
| 752.7 INDETERMINATE SEX AND PSEUDOHERMAPHRODITISM                                     | 39       |
| 752.7 HERMAPHRODITISM                                                                 | 1        |
| 752.7 PERSISTENT MULLERIAN DUCT SYNDROME                                              | 1        |
| 752.7 DISORDER OF SEXUAL DIFFERENTIATION                                              | 1        |
| 752.7 Ambiguous genitalia                                                             | 0        |
| 752.7 GONADAL DYSGENESIS, 46,XY                                                       | 1        |
| CAIS complete androgen insensitivity listed without an ICD9 code                      | 0        |
