# Supplementary material for: Unbiased Identification of Patients with Disorders of Sex Development
Source: PubMed Central journal article supplement (PMC4182545; doi:10.1371/journal.pone.0108702), 2014-09-30
Supplement: pone.0108702.s019.pdf [file pone.0108702.s019.pdf]

**Table S19. Collapsed/merged ICD-9 codes for Hospitals B and C combined**

| <b>ICD-9 code</b> | <b>Found by traditional approach<br/>(data from Table S2)</b> | <b>Found by informatics approach only<br/>(data from Table S5)</b> | <b>Ratio of cases<br/>informatics only / traditional approach</b> |
|-------------------|---------------------------------------------------------------|--------------------------------------------------------------------|-------------------------------------------------------------------|
| 255.2             | 28                                                            | 73                                                                 | 2.6                                                               |
| 259.5             | 1                                                             | 3                                                                  | 3.0                                                               |
| 752.4             | 1                                                             | 1                                                                  | 1.0                                                               |
| 752.49            | 3                                                             | 7                                                                  | 2.3                                                               |
| 752.51            | 10                                                            | 13                                                                 | 1.3                                                               |
| 752.61            | 27                                                            | 179                                                                | 6.6                                                               |
| 752.64            | 5                                                             | 55                                                                 | 11.0                                                              |
| 752.69            | 2                                                             | 51                                                                 | 25.5                                                              |
| 752.7             | 40                                                            | 60                                                                 | 1.5                                                               |
